# Supplementary material for: Caveolin-1 is required for lateral line neuromast and notochord development
Source: Oxford University Press journal article supplement (doi:10.1242/jcs.003830), 2007-06-06
Supplement: jcs003830tables1.pdf [file jcs003830tables1.pdf]

**Table 1. Summary of defects in zebrafish embryos observed after treatment with *cav1*-MO1 and *cav1*-MO2**

| %                      | <i>cav1</i> -MO1 ( <i>n</i> =126) | <i>cav1</i> -MO2 ( <i>n</i> =107) | Control MO ( <i>n</i> =82) |
|------------------------|-----------------------------------|-----------------------------------|----------------------------|
| Normal                 | 8                                 | 6                                 | 98                         |
| Curved under           | 39                                | 32                                | 0                          |
| Notochord/tail defects | 36                                | 61                                | 0                          |
| Severe                 | 11                                | 1                                 | 0                          |
| Dead                   | 6                                 | 0                                 | 2                          |
